# Supplementary material for: Abundance indices and biological traits of juvenile salmon (Salmo salar) sampled in three rivers on the Atlantic and Channel coasts (France)
Source: Biodivers Data J. 2017 Nov 9;(5):e15125. doi: 10.3897/BDJ.5.e15125 (PMC5740413; doi:10.3897/BDJ.5.e15125)
Supplement: Supplementary material 1 — Sampling events by site and by year [file bdj-05-e15125-s001.xlsx]

## Sheet: Feuil1
Sampling events (x) by site and by year in the Oir River
Sites	Latitude (DD)	Longitude (DD)	1993	1994	1995	1996	1997	1998	1999	2000	2001	2002	2003	2004	2005	2006	2007	2008	2009	2010	2011	2012	2013	2014	2015	2016
IAS-01	-1.28214	48.6256		X					X	X	X	X	X	X	X	X	X	X	X	X	X	X	X	X	X	X
IAS-02	-1.25901	48.6418		X		X	X		X	X	X	X	X	X	X	X	X	X	X	X	X	X	X	X	X	X
IAS-03	-1.2468	48.6444		X					X										X	X	X	X	X	X	X	X
IAS-04	-1.23315	48.6433		X	X	X	X		X	X	X	X	X	X	X	X	X	X	X	X	X	X	X	X	X	X
IAS-05	-1.20012	48.6388		X	X	X			X	X	X	X	X	X	X	X	X	X	X	X	X	X	X	X	X	X
IAS-06	-1.19606	48.639																	X	X	X	X	X	X	X	X
IAS-07	-1.19127	48.6382																	X	X	X	X	X	X	X	X
IAS-08	-1.17956	48.6376		X		X	X		X	X	X	X	X	X	X	X	X	X	X	X	X	X	X	X	X	X
IAS-09	-1.16136	48.6395															X	X	X	X	X	X	X	X	X	X
IAS-10	-1.14282	48.6369																	X	X	X	X	X	X	X	X
IAS-11	-1.25538	48.6495		X					X		X	X	X	X	X	X	X	X	X	X	X	X	X	X	X	X
IAS-12	-1.17202	48.6445	X	X	X	X	X		X		X	X	X	X	X	X	X	X	X	X	X	X	X	X	X	X
IAS-13	-1.13001	48.6409																								X
Sampling events (x) by site and by year in the Scorff River
Sites	Latitude (DD)	Longitude (DD)	1993	1994	1995	1996	1997	1998	1999	2000	2001	2002	2003	2004	2005	2006	2007	2008	2009	2010	2011	2012	2013	2014	2015	2016
S01	-3.39419	47.8358	x	x	x	x	x	x	x	x	x	x	x	x	x	x	x	x	x	x	x	x	x	x	x	x
S02	-3.39042	47.8453		x	x	x	x	x	x	x	x	x	x	x	x	x	x	x	x	x	x	x	x	x	x	x
S03	-3.40096	47.8591	x	x	x	x	x	x	x	x	x	x	x	x	x	x	x	x	x	x	x	x	x	x	x	x
S04	-3.40133	47.8735	x	x	x	x	x	x	x	x	x	x	x	x	x	x	x	x	x	x	x	x	x	x	x	x
S05	-3.40242	47.8835	x	x	x	x	x	x	x	x	x	x	x	x	x	x	x	x	x	x	x	x	x	x	x	x
S06	-3.40687	47.8953	x	x	x	x	x	x	x	x	x	x	x	x	x	x	x	x	x	x	x	x	x	x	x	x
S07	-3.40649	47.9028	x	x	x	x	x	x	x	x	x	x	x	x	x	x	x	x	x	x	x	x	x	x	x	x
S08	-3.41181	47.9037	x	x	x	x	x	x	x	x	x	x	x	x	x	x	x	x	x	x	x	x	x	x	x	x
S09	-3.41925	47.9051	x	x	x	x	x	x	x	x	x	x	x	x	x	x	x	x	x	x	x	x	x	x	x	x
S10	-3.40614	47.9094	x	x	x	x	x	x	x	x	x	x	x	x	x	x	x	x	x	x	x	x	x	x	x	x
S11	-3.40899	47.915	x	x	x	x	x	x	x	x	x	x	x	x	x	x	x	x	x	x	x	x	x	x	x	x
S12	-3.40674	47.9173	x	x	x	x	x	x	x	x	x	x	x	x	x	x	x	x	x	x	x	x	x	x	x	x
S13	-3.4008	47.919	x	x	x	x	x	x	x	x	x	x	x	x	x	x	x	x	x	x	x	x	x	x	x	x
S14	-3.39611	47.9174	x	x	x	x	x	x	x	x	x	x	x	x	x	x	x	x	x	x	x	x	x	x	x	x
S15	-3.39396	47.9332	x	x	x	x	x	x	x	x	x	x	x	x	x	x	x	x	x	x	x	x	x	x	x	x
S16	-3.3986	47.936	x	x	x	x	x	x	x	x	x	x	x	x	x	x	x	x	x	x	x	x	x	x	x	x
S17	-3.40177	47.9435	x	x	x	x	x	x	x	x	x	x	x	x	x	x	x	x	x	x	x	x	x	x	x	x
S18	-3.39708	47.9476	x	x	x	x	x	x	x	x	x	x	x	x	x	x	x	x	x	x	x	x	x	x	x	x
S19	-3.39331	47.9509	x	x	x	x	x	x	x	x	x	x	x	x	x	x	x	x	x	x	x	x	x	x	x	x
S20	-3.37907	47.9491	x	x	x	x	x	x	x	x	x	x	x	x	x	x
S201	-3.37559	47.9506															x	x	x	x	x	x	x	x	x	x
S21	-3.37082	47.9502	x	x	x	x	x	x	x	x	x	x	x	x	x	x	x	x	x	x	x	x	x	x	x	x
S22	-3.36266	47.9436	x	x	x	x	x	x	x	x	x	x	x	x	x	x	x	x	x	x	x	x	x	x	x	x
S23	-3.35661	47.9444	x	x	x	x	x	x	x	x	x	x	x	x	x	x	x	x	x	x	x	x	x	x	x	x
S24	-3.35137	47.9528	x	x	x	x	x	x	x	x	x	x	x	x	x	x	x	x	x	x	x	x	x	x	x	x
S25	-3.34976	47.9625	x	x	x	x	x	x	x	x	x	x	x	x	x	x	x	x	x	x	x	x	x	x	x	x
S26	-3.34231	47.9686	x	x	x	x	x	x	x	x	x	x	x	x	x	x	x	x	x	x	x	x	x	x	x	x
S27	-3.33869	47.9759	x	x	x	x	x	x	x	x	x	x	x	x	x	x	x	x	x	x	x	x	x	x	x	x
S28	-3.33094	47.9835	x	x	x	x	x	x	x	x	x	x	x	x	x	x	x	x	x	x	x	x	x	x	x	x
S29	-3.3247	47.9875	x	x	x	x	x	x	x	x	x	x	x	x	x	x	x	x	x	x	x	x	x	x	x	x
S30	-3.31304	47.9905	x	x	x	x	x	x	x	x	x	x	x	x	x	x	x	x	x	x	x	x	x	x	x	x
S31	-3.30705	47.9926	x	x	x	x	x	x	x	x	x	x	x	x	x	x	x	x	x	x	x	x	x	x	x	x
S32	-3.29488	47.995	x	x	x	x	x	x	x	x	x	x	x	x	x	x	x	x	x	x	x	x	x	x	x	x
S33	-3.28946	47.9971	x	x	x	x	x	x	x	x	x	x	x	x	x	x	x	x	x	x	x	x	x	x	x	x
S34	-3.26939	47.9995	x	x	x	x	x	x	x	x	x	x	x	x	x	x	x	x	x	x	x	x	x	x	x	x
S35	-3.26527	48.0041	x	x	x	x	x	x	x	x	x	x	x	x	x	x	x	x	x	x	x	x	x	x	x	x
S36	-3.24926	48.0052	x	x	x	x	x	x		x	x	x	x	x	x	x	x	x	x	x	x	x	x	x	x	x
S37	-3.24489	48.0135	x	x	x	x	x	x	x	x	x	x	x	x	x	x	x	x	x	x	x	x	x	x	x	x
S38	-3.24535	48.0204	x		x	x	x	x	x	x	x	x	x	x	x	x	x	x	x	x	x	x	x	x	x	x
S39	-3.21385	48.0667	x	x	x	x	x	x	x	x		x	x		x	x	x	x	x	x	x	x	x	x	x	x
S40	-3.20871	48.0753		x	x	x	x	x	x	x	x	x		x	x		x	x	x	x	x	x	x	x	x	x
S41	-3.21414	48.0913		x	x	x	x	x	x	x	x	x	x	x	x		x	x	x	x	x	x	x	x	x
SA11	-3.38558	47.879			x	x	x	x	x	x	x	x	x		x	x	x	x	x	x	x	x	x		x	x
SA12	-3.37965	47.8905											x									x
SA21	-3.39993	47.8631	x	x	x	x
SA22	-3.41043	47.866	x	x	x	x	x
SA23	-3.42661	47.8706	x		x	x		x	x	x	x	x	x	x	x	x	x	x	x	x	x	x	x	x	x	x
SA31	-3.40291	47.8757	x	x	x	x	x
SA32	-3.41079	47.8765	x			x		x	x	x	x	x	x	x	x	x	x	x	x	x	x	x	x	x	x	x
SA33	-3.41685	47.8812	x	x	x
SA41	-3.40741	47.9189	x	x	x	x	x	x	x	x	x	x	x	x	x	x	x	x	x	x	x	x	x	x	x	x
SA42	-3.41392	47.9221	x	x	x	x
SA43	-3.42108	47.9304	x	x	x	x
SA51	-3.3903	47.9614	x	x	x
SA61	-3.35235	47.9452					x	x	x
SA71	-3.3189	47.9691		x		x	x	x	x	x	x	x	x	x	x	x	x	x	x	x	x	x	x	x	x	x
SA72	-3.32738	47.976												x	x	x	x	x	x	x	x	x	x	x	x	x
SA81	-3.33371	47.9845	x	x	x	x
SA811	-3.27444	48.0345					x	x	x	x	x	x	x	x	x		x	x	x	x	x	x	x	x	x	x
SA812	-3.33411	48.0287					x																		x	x
SA813	-3.33141	48.0154																								x
SA82	-3.3341	47.9894	x	x	x	x	x	x	x	x	x	x	x	x	x	x	x	x	x	x	x	x	x	x	x	x
SC01	-3.40555	47.8084													x	x	x	x	x	x	x	x	x	x	x	x
SC02	-3.41168	47.8103											x	x	x	x	x	x	x	x	x	x	x	x	x	x
SC03	-3.44832	47.8278														x						x	x
SC04	-3.46785	47.8431																x	x	x	x				x	x
Sampling events (X) by site and by year in the Nivelle River
Sites	Latitude (DD)	Longitude (DD)	2003	2004	2005	2006	2007	2008	2009	2010	2011	2012	2013	2014	2015	2016
ANUMENIA_AM	-1.57074	43.2998			x
ANUMENIA_AV	-1.57074	43.2998	x
BETRIENEA	-1.53527	43.3185	x	x	x	x	x	x	x	x	x	x	x	x	x	x
CONF_SORRIMENTA	-1.53028	43.3092	x	x	x	x	x	x	x	x	x	x	x	x	x	x
CONSERVERIE	-1.5662	43.3078	x	x	x	x	x	x	x	x	x	x	x	x	x	x
COUILLU	-1.5458	43.3177			x	x	x	x	x	x	x	x	x	x	x	x
DARGUY_AM	-1.59473	43.3655				x	x	x	x	x	x	x	x	x	x	x
DARGUY_AV	-1.51806	43.3081			x	x	x	x	x	x	x	x	x	x	x	x
ESKOLA_AM	-1.59473	43.3655	x	x
ESKOLA_AV	-1.59677	43.3656		x
GD_CHENE	-1.53249	43.3127			x	x			x	x	x	x	x	x	x	x
ILE_AMOTZ	-1.54094	43.3394	x	x	x	x	x	x	x	x	x	x	x	x	x	x
INRA	-1.56809	43.3522	x	x	x	x	x	x	x	x	x	x	x	x	x	x
KAMIETA	-1.53992	43.3376	x	x
LIZUNIA	-1.59114	43.2956	x
LYONNAISE	-1.55202	43.3198			x	x	x	x	x	x	x	x	x	x	x	x
OHALDEA	-1.55804	43.3124	x	x	x	x	x	x	x	x	x	x	x	x	x	x
OLHA	-1.5515	43.3475	x	x	x	x	x	x	x	x	x	x	x	x	x	x
OPALAZIO	-1.53267	43.3167			x	x	x	x	x	x	x	x	x	x	x	x
PT_AMOTZ	-1.54293	43.331	x		x	x	x	x	x	x	x	x	x	x	x	x
PT_ASCAIN	-1.62307	43.3507						x	x	x	x	x	x	x	x	x
PTT_CHENE	-1.52619	43.3066	x		x	x	x	x	x	x	x	x	x	x	x	x
RAU_SORRIMENTA	-1.53098	43.304	x		x	x	x			x	x	x	x	x	x	x
SALLABERI	-1.60653	43.3598			x	x	x	x	x	x	x	x	x	x	x	x
USTEGABEA	-1.54787	43.3253	x	x	x	x	x	x	x	x	x	x	x	x	x	x
ZAHARA	-1.52226	43.309			x	x	x	x	x	x	x	x	x	x	x	x
ZALDUBIA	-1.56092	43.355	x	x
ZUMABIA	-1.59206	43.3648			x	x	x	x	x	x	x	x	x	x	x	x
